# Supplementary material
Source: PubMed Central journal article supplement (PMC1794312)

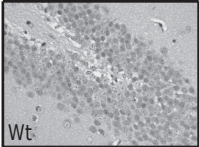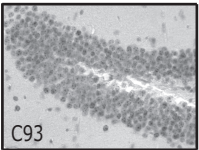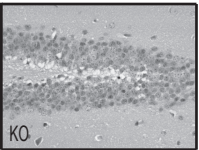

Supplement: pnas_0610593104_1.pdf [file pnas_0610593104_1.pdf]
